# Supplementary material for: Gene expression profiles in rat brain disclose CNS signature genes and regional patterns of functional specialisation
Source: PubMed Central journal article supplement (PMC1853090; doi:10.1186/1471-2164-8-94), 2007-04-04

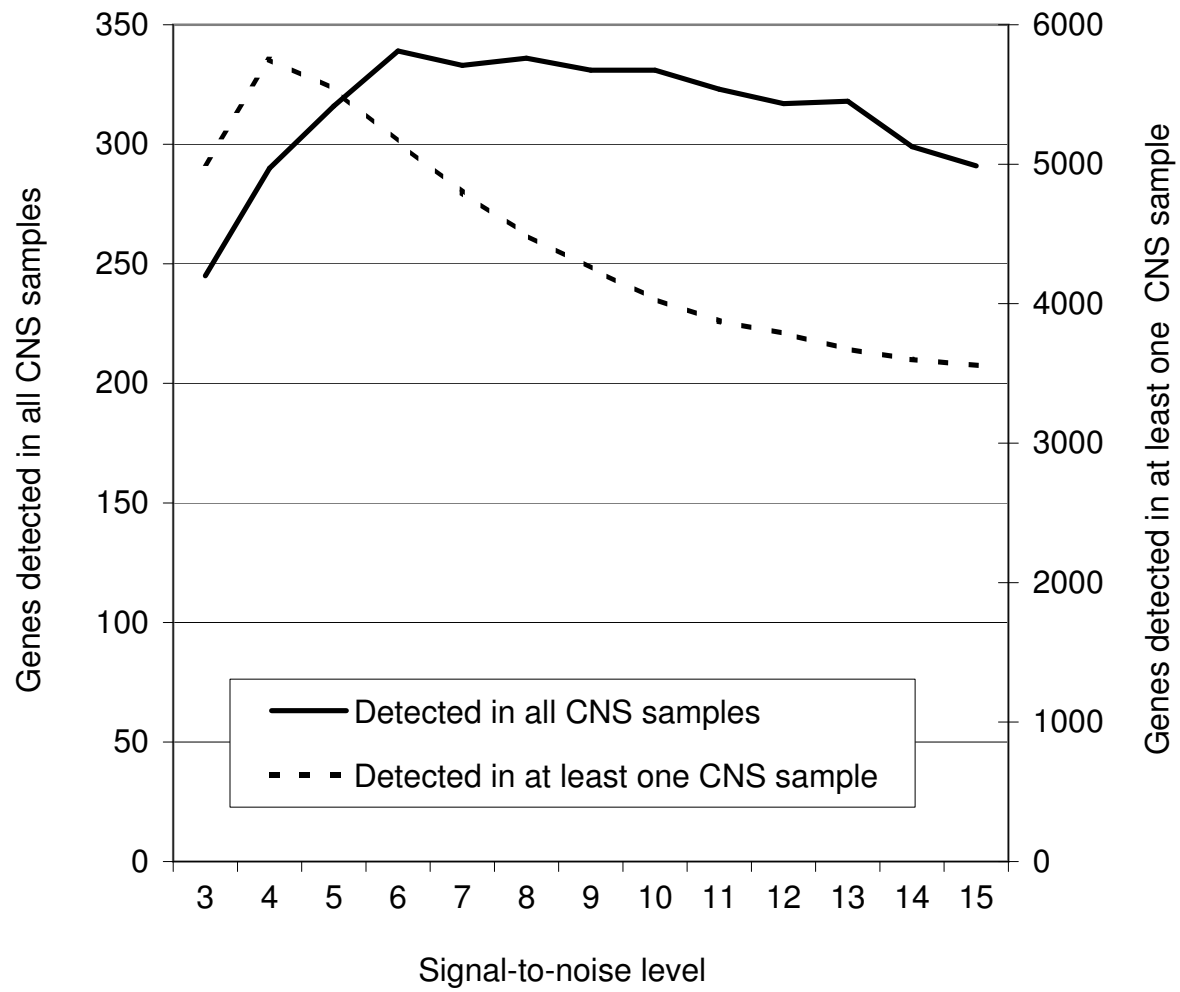

Supplement: 1471-2164-8-94-S3.pdf [file 1471-2164-8-94-S3.pdf]
