# Supplementary material for: Gene expression profiles in rat brain disclose CNS signature genes and regional patterns of functional specialisation
Source: PubMed Central journal article supplement (PMC1853090; doi:10.1186/1471-2164-8-94), 2007-04-04
Supplement: 1471-2164-8-94-S4.pdf [file 1471-2164-8-94-S4.pdf]

$S/N \geq 3$ :  
243 CNS-specific  
genes

$S/N \geq 6$ :  
337 CNS-specific  
genes

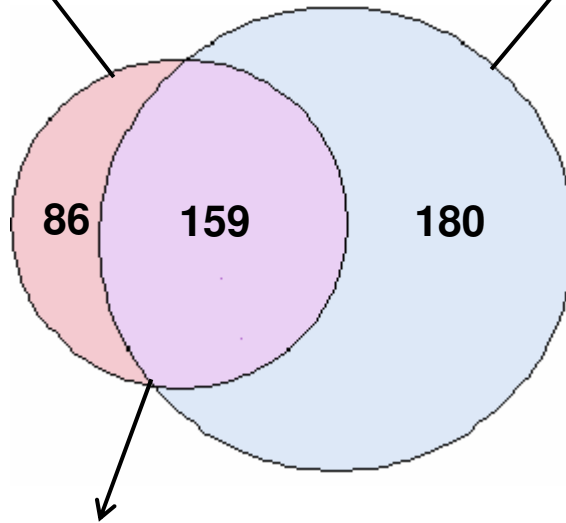

$S/N \geq 6$  in all CNS samples,  
 $S/N < 3$  in all other samples:  
**159 CNS-signature genes**
